# Supplementary material
Source: publisher figshare collection journal article supplement (https://geolsoc.figshare.com/ndownloader/files/21902754)
Supplement: Supplementary file 1 [file 21902754]

## Sheet: Table 2
Table 2. The CAESAR-Lisflood parameter values for the flood simulations
CAESAR-Lisflood parameter	Values
Grain sizes (m)	0.0017, 0.004, 0.00708, 0.001261, 0.02365, 0.0467, 0.1285, 0.2986
Grainsize proportions (corresponding to sizes above)	0.006, 0.004, 0.026, 0.076, 0.144, 0.282, 0.426, 0.036
Sediment transport law	Wilcock and Crowe
Active layer thickness (m)	0.1
In-channel lateral erosion rate	20
Lateral erosion rate	0.0001
Number of passes for edge smoothing filter	100
Vegetation critical shear stress	180
Water depth threshold above which erosion will happen (m)	0.01
Courant number*	0.3
Manning's n	0.039 for constant models
*Value that controls the numerical stability and speed of operation of the flow (see Bates et al., (2010)).
Further details on the CAESAR-Lisflood parameters can be found in Coulthard et al. (2013) and Van de Weil et al. (2007).
